# Supplementary material
Source: PubMed Central journal article supplement (PMC384808)

**a**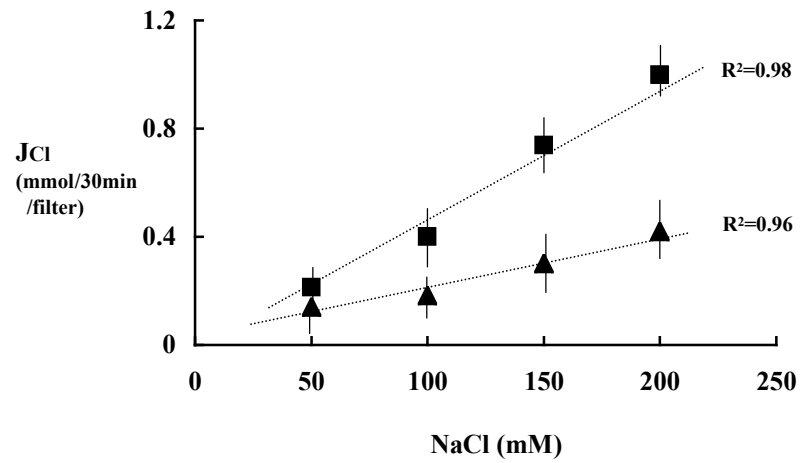**b**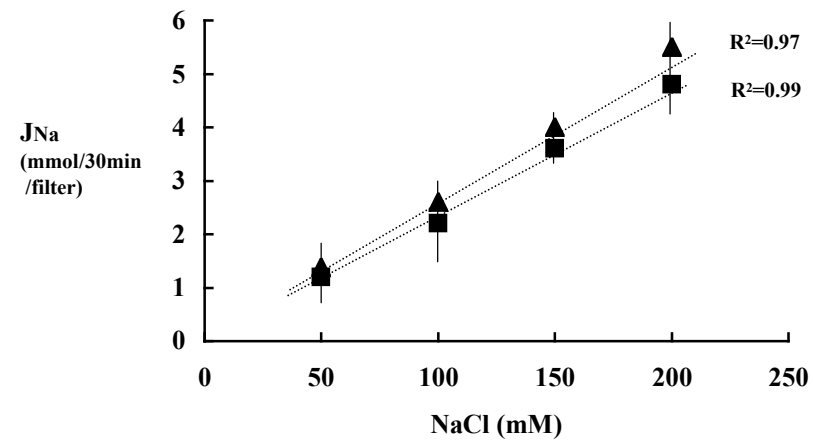

▲ Vector  
 ■ Mutant WNK4

**c**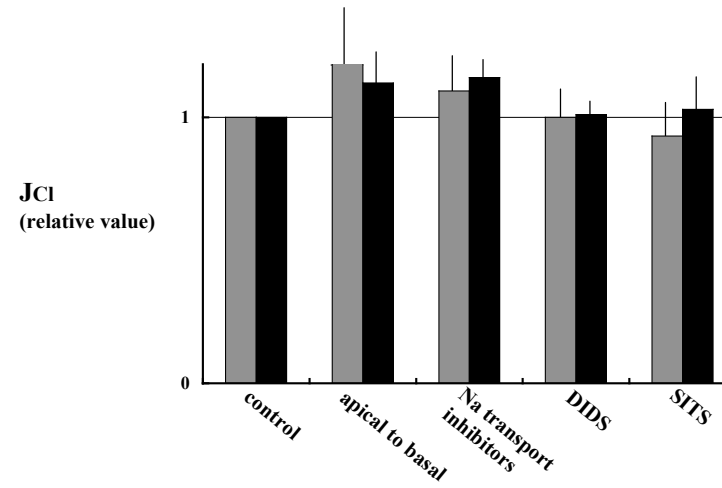**d**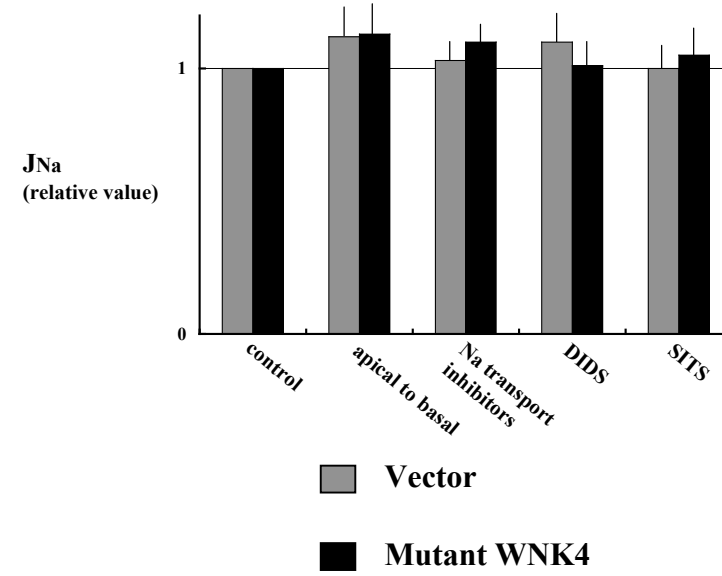

■ Vector  
 ■ Mutant WNK4

Supplement: pnas_101_13_4690__2.pdf [file pnas_101_13_4690__2.pdf]

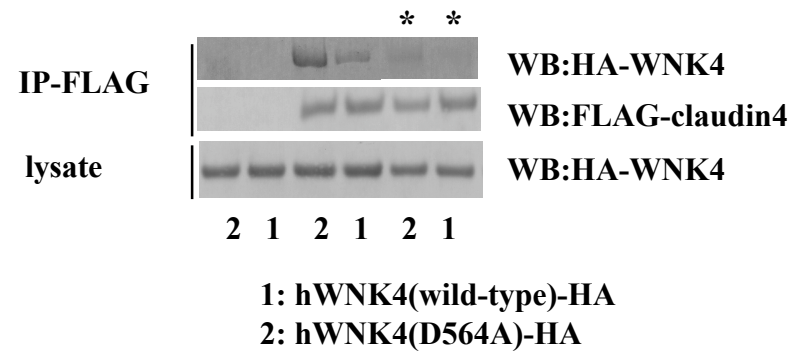

Supplement: pnas_101_13_4690__4.pdf [file pnas_101_13_4690__4.pdf]
